# Supplementary figures and images for: VNTR2/VNTR3 genotype in the FCGRT gene is associated with reduced effectiveness of intravenous immunoglobulin in patients with myasthenia gravis
Source: PubMed Central journal article supplement — Ther Adv Neurol Disord. 2021 Jan 27;14:1756286420986747. doi: 10.1177/1756286420986747 (PMC7844454; doi:10.1177/1756286420986747), 2021-01-27

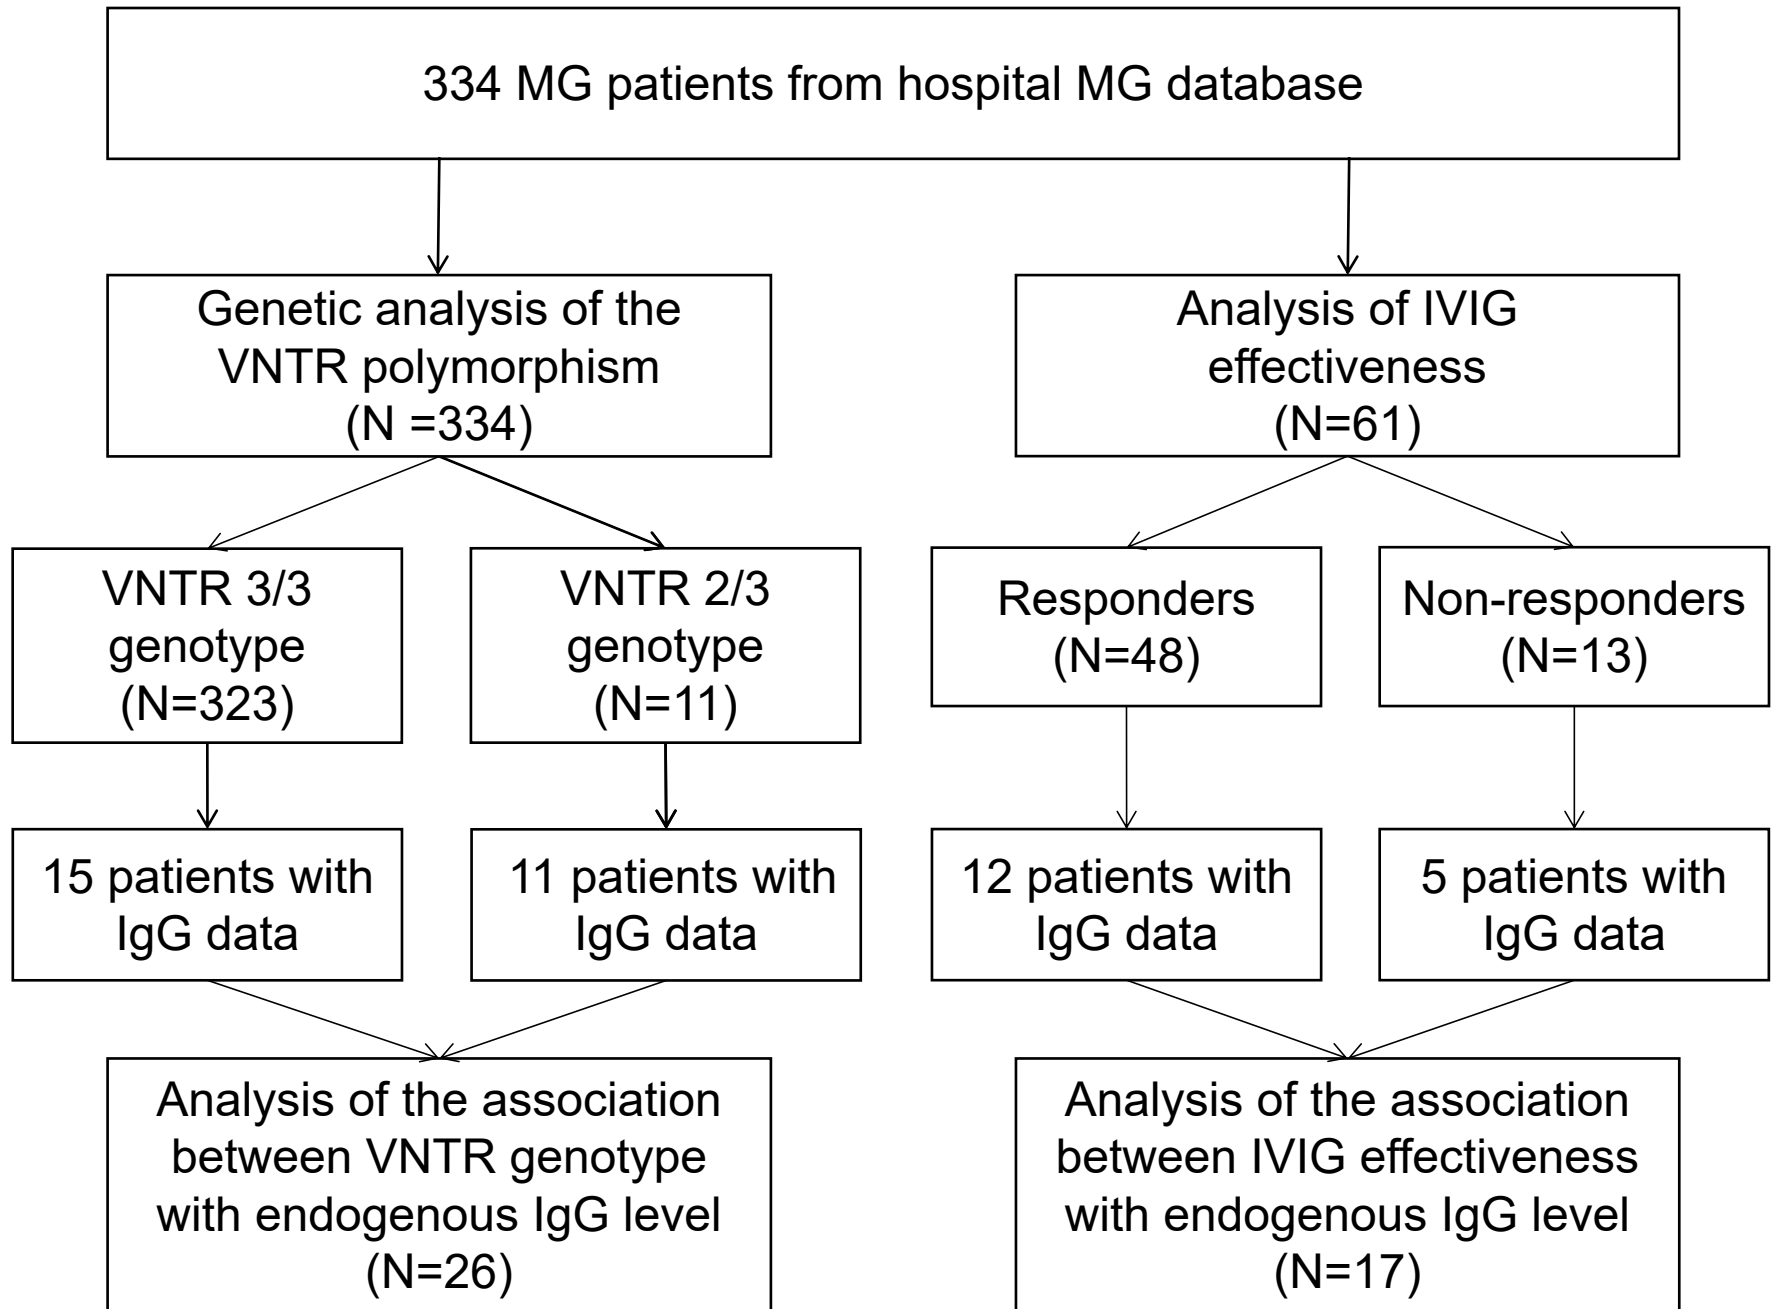

Supplement: sj-pdf-1-tan-10.1177_1756286420986747.pdf [file sj-pdf-1-tan-10.1177_1756286420986747.pdf]
